# Supplementary material for: Ligand-to-ligand charge transfer in heteroleptic Ir-complexes: comprehensive investigations of its fast dynamics and mechanism
Source: Royal Society of Chemistry journal article supplement (doi:10.1039/c6cp02087a), 2016-01-01
Supplement: c6cp02087a1.pdf [file c6cp02087a1.pdf]

## Ligand-to-ligand charge transfer in heteroleptic Ir-complexes: Comprehensive investigations of its fast dynamics and mechanism

Yang-Jin Cho,<sup>a</sup> So-Yoen Kim,<sup>a</sup> Minji Cho,<sup>a</sup> Kyung-Ryang Wee,<sup>b</sup> Ho-Jin Son,<sup>a</sup> Won-Sik Han,<sup>c</sup> Dae Won Cho,<sup>ad\*</sup> and Sang Ook Kang<sup>a\*</sup>

<sup>a</sup>Department of Advanced Materials Chemistry, Korea University (Sejong), Sejong, 30019, South Korea. E-mails: [hjson@korea.ac.kr](mailto:hjson@korea.ac.kr) and [sangok@korea.ac.kr](mailto:sangok@korea.ac.kr)

<sup>b</sup>Department of Chemistry, Daegu University, Gyeongsan, 38453, South Korea. E-mails: [krwee@daegu.ac.kr](mailto:krwee@daegu.ac.kr)

<sup>c</sup>Department of Chemistry, Seoul Women's University, Seoul, 01797, South Korea. E-mails: [wshan@swu.ac.kr](mailto:wshan@swu.ac.kr)

<sup>d</sup>Center for Photovoltaic Materials, Korea University (Sejong), Sejong, 30019, South Korea. E-mail: [dwcho@korea.ac.kr](mailto:dwcho@korea.ac.kr)

### Figures

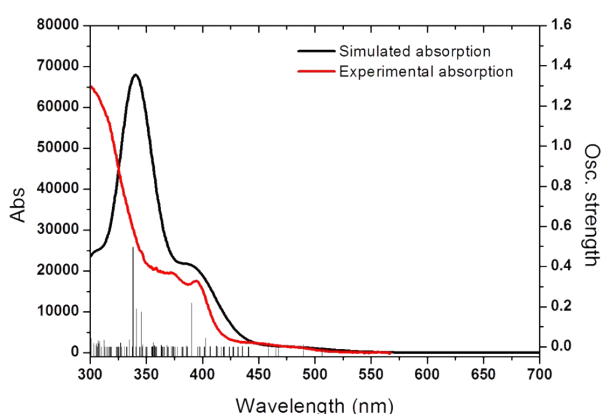

**Fig. S1** Simulated absorption spectrum of complex **1** using a TD-DFT with full width at half-maximum of 3000 cm<sup>-1</sup> (black) and experimental absorption spectrum. The vertical bars correspond to the individual excited states.

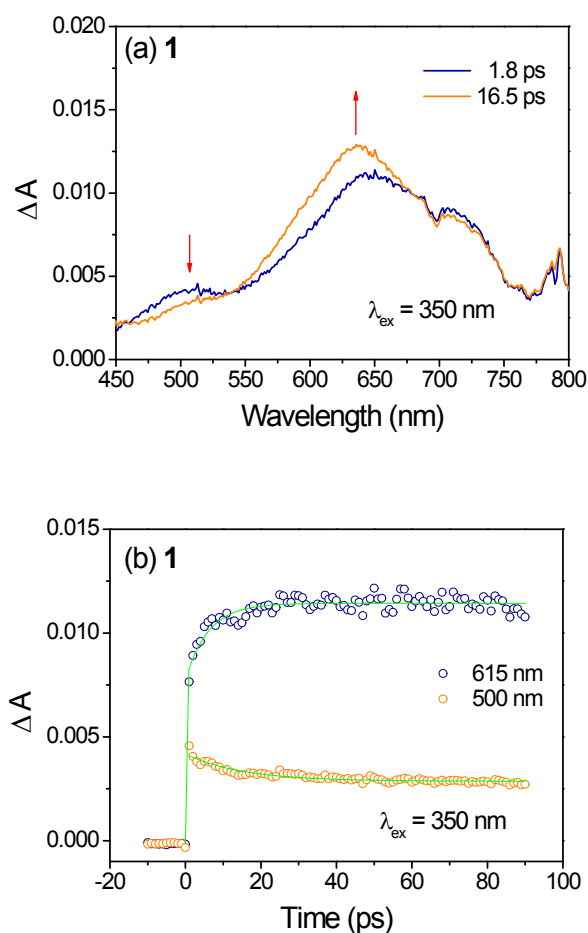

**Fig. S2.** (a) TA spectra of complex **1** in CH<sub>2</sub>Cl<sub>2</sub> measured after selected time delays. All transient spectra were corrected for the chirp. Figure (b) is the temporal profiles monitored at different wavelengths. The excitation wavelengths were 350 nm.

## Tables

Table S1 Calculated energy levels of 50-transitions for complex 1

| No. | Wavelength (nm) | Oscillation Strength | Symmetry  | Major Contributions                                           |
|-----|-----------------|----------------------|-----------|---------------------------------------------------------------|
| 1   | 506.24          | 0.0                  | Triplet-A | HOMO→LUMO (54%), HOMO→L+1 (20%)                               |
| 2   | 489.51          | 0.0105               | Singlet-A | HOMO→LUMO (79%), HOMO→L+1 (18%)                               |
| 3   | 489.43          | 0.0                  | Triplet-A | H-6→L+2 (12%), H-5→LUMO (27%), H-5→L+1 (14%), HOMO→LUMO (13%) |
| 4   | 467.64          | 0.0                  | Triplet-A | H-1→LUMO (62%), H-1→L+1 (17%)                                 |
| 5   | 465.38          | 0.0                  | Triplet-A | H-6→LUMO (41%), H-6→L+1 (31%)                                 |
| 6   | 458.56          | 0.0115               | Singlet-A | H-1→LUMO (75%), H-1→L+1 (16%)                                 |
| 7   | 441.14          | 0.0                  | Triplet-A | H-6→LUMO (10%), HOMO→LUMO (18%), HOMO→L+1 (47%)               |
| 8   | 440.67          | 0.0                  | Triplet-A | H-8→LUMO (13%), H-6→L+1 (10%)                                 |
| 9   | 435.48          | 0.0013               | Singlet-A | HOMO→L+1 (77%), HOMO→LUMO (19%)                               |
| 10  | 431.42          | 0.0                  | Triplet-A | HOMO→L+3 (35%), HOMO→L+4 (23%)                                |
| 11  | 427.49          | 0.0                  | Triplet-A | H-3→LUMO (69%), H-3→L+1 (27%)                                 |
| 12  | 426.99          | 0.0                  | Triplet-A | HOMO→L+1 (10%), HOMO→L+2 (53%)                                |
| 13  | 424.00          | 0.0                  | Singlet-A | H-3→LUMO (72%), H-3→L+1 (26%)                                 |
| 14  | 423.77          | 0.0                  | Triplet-A | H-2→LUMO (11%), H-1→L+3 (18%), H-1→L+4 (20%)                  |
| 15  | 419.51          | 0.0010               | Singlet-A | HOMO→L+2 (70%), H-2→LUMO (19%)                                |
| 16  | 418.74          | 0.0003               | Singlet-A | H-2→LUMO (55%), HOMO→L+2 (22%)                                |
| 17  | 418.62          | 0.0                  | Triplet-A | H-2→LUMO (35%), H-2→L+1 (10%), H-1→LUMO (14%)                 |
| 18  | 416.58          | 0.0                  | Triplet-A | H-9→LUMO (40%), H-9→L+1 (34%)                                 |
| 19  | 413.42          | 0.0                  | Triplet-A | H-6→L+2 (29%), H-5→LUMO (15%), HOMO→L+2 (23%)                 |
| 20  | 412.39          | 0.0035               | Singlet-A | H-1→L+1 (71%), H-1→LUMO (14%)                                 |
| 21  | 412.30          | 0.0                  | Triplet-A | H-1→LUMO (11%), H-1→L+1 (55%)                                 |
| 22  | 406.78          | 0.0010               | Singlet-A | H-5→LUMO (65%), H-5→L+1 (13%), H-4→LUMO (15%)                 |
| 23  | 402.54          | 0.0440               | Singlet-A | H-5→LUMO (14%), H-4→LUMO (64%)                                |
| 24  | 401.61          | 0.0                  | Triplet-A | H-4→LUMO (52%), H-4→L+1 (11%)                                 |
| 25  | 397.76          | 0.0                  | Triplet-A | H-1→L+2 (69%)                                                 |
| 26  | 397.01          | 0.0027               | Singlet-A | H-1→L+2 (87%)                                                 |
| 27  | 395.56          | 0.0                  | Triplet-A | H-8→LUMO (11%), H-6→LUMO (13%), H-6→L+1 (14%), H-5→LUMO (10%) |
| 28  | 390.10          | 0.2187               | Singlet-A | H-6→LUMO (72%)                                                |
| 29  | 386.40          | 0.0                  | Triplet-A | H-2→LUMO (12%), H-2→L+1 (69%)                                 |
| 30  | 385.26          | 0.0055               | Singlet-A | H-2→L+1 (79%), H-2→LUMO (12%)                                 |
| 31  | 382.61          | 0.0                  | Triplet-A | H-5→L+1 (13%), H-5→L+2 (43%), H-4→L+2 (12%)                   |
| 32  | 382.09          | 0.0                  | Triplet-A | H-7→LUMO (17%), H-3→L+2 (59%)                                 |
| 33  | 381.34          | 0.0                  | Triplet-A | H-8→LUMO (13%), H-6→L+1 (12%), H-5→L+1 (16%), H-5→L+2 (25%)   |
| 34  | 377.46          | 0.0                  | Triplet-A | H-3→LUMO (28%), H-3→L+1 (70%)                                 |
| 35  | 377.38          | 0.0                  | Singlet-A | H-3→LUMO (26%), H-3→L+1 (70%)                                 |
| 36  | 375.44          | 0.0001               | Singlet-A | H-3→L+2 (53%), H-7→LUMO (27%), H-7→L+1 (11%)                  |
| 37  | 374.06          | 0.0                  | Triplet-A | H-4→L+1 (31%), H-2→L+2 (35%)                                  |
| 38  | 373.56          | 0.0018               | Singlet-A | H-5→L+1 (49%), H-4→L+1 (30%), H-5→LUMO (15%)                  |
| 39  | 373.36          | 0.0009               | Singlet-A | H-4→L+1 (26%), H-6→L+1 (22%), H-5→L+1 (13%), H-5→L+2 (16%)    |
| 40  | 372.06          | 0.0019               | Singlet-A | H-2→L+2 (46%), H-5→L+1 (16%)                                  |
| 41  | 369.29          | 0.0                  | Triplet-A | H-4→L+1 (26%), H-2→L+2 (52%)                                  |
| 42  | 369.03          | 0.0                  | Triplet-A | H-7→LUMO (51%), H-7→L+1 (19%), H-3→L+2 (22%)                  |
| 43  | 368.13          | 0.0077               | Singlet-A | H-2→L+2 (43%), H-8→LUMO (10%), H-4→L+1 (16%)                  |
| 44  | 365.70          | 0.0                  | Triplet-A | H-2→L+3 (13%), H-1→L+3 (21%), H-1→L+4 (13%)                   |
| 45  | 364.32          | 0.0003               | Singlet-A | H-7→LUMO (42%), H-7→L+1 (14%), H-3→L+2 (39%)                  |
| 46  | 363.67          | 0.0                  | Triplet-A | H-8→L+2 (10%), H-5→L+7 (15%)                                  |
| 47  | 363.29          | 0.0095               | Singlet-A | H-8→LUMO (47%), H-6→L+1 (35%)                                 |
| 48  | 359.03          | 0.0                  | Triplet-A | H-10→LUMO (15%), H-8→L+1 (13%), H-4→L+2 (26%)                 |
| 49  | 358.82          | 0.0                  | Triplet-A | H-7→L+2 (13%), H-3→L+7 (64%)                                  |
| 50  | 357.90          | 0.0                  | Triplet-A | H-8→L+1 (14%), HOMO→L+3 (10%)                                 |

<sup>a</sup> Footnote text.
